# Supplementary material for: Preliminary Exploration of Metabolic Mechanisms in Copper-Exposed Sepia esculenta Based on Transcriptome Analysis
Source: MDPI journal article supplement (doi:10.3390/metabo13040471), 2023-03-25
Supplement: s1 [file s1]

**Table S1 List of primers used for qRT-PCR validation.**

| Gene name       | Forward primer (5'-3') | TM (°C) | Reverse primer (5'-3') | TM (°C) | Amplicon length (bp) |
|-----------------|------------------------|---------|------------------------|---------|----------------------|
| <i>CYP7A1</i>   | CTCACTTTCGGTACCCTTG    | 60      | CGTGACCGTGGTAGTTAATG   | 60      | 142                  |
| <i>CYP3A11</i>  | GCAAACACTCTGTCCTTCTT   | 60      | GGTCAGCTTCTGCACATTAT   | 60      | 129                  |
| <i>ABCA1</i>    | GAAAGCCTGAGCCGTAATC    | 60      | AGCGTAGAAGGCCAGTAA     | 60      | 111                  |
| <i>ABCC7</i>    | CCTGGTCAGTCGTTTCTTATC  | 60      | GAGCCATCTTCAGCAATCTC   | 60      | 125                  |
| <i>CACNA1D</i>  | GCAGATGTTTGGCAGAATAG   | 59      | CTGTGGCAGATCGGAATAA    | 59      | 107                  |
| <i>CYP3A41A</i> | GCTGATACAGCTGATACGATG  | 60      | AAGAGCTGTTGGCTTTGG     | 60      | 105                  |
| <i>ABCC1</i>    | GTTTGGCTGCGAAATTGG     | 60      | TCCAAGAGCACCGTAGAT     | 60      | 114                  |
| <i>LRP2</i>     | AACCTCCCGGACATTGTA     | 60      | GTAGGGCACAGTCTCATTTC   | 60      | 131                  |
| <i>NPR1</i>     | CAACTGTGTGGTGGATAGTC   | 60      | GGTGCCGTCCAAAGTAAT     | 60      | 132                  |
| <i>COL12A1</i>  | AACTACCTGCTCCCATACA    | 60      | GAGGGTTTCTGTCCATCAG    | 60      | 110                  |
| <i>COL6A6</i>   | TGAGACACGTGGCTATACT    | 60      | TGATGGCCGATACCAATAAC   | 60      | 121                  |
| <i>CYP2J6</i>   | TCGAGAGGAGATCCGAAAG    | 60      | ACAGCAACTGAGGCAATC     | 60      | 120                  |
