# Supplementary material for: Preliminary Exploration of Metabolic Mechanisms in Copper-Exposed Sepia esculenta Based on Transcriptome Analysis
Source: MDPI journal article supplement (doi:10.3390/metabo13040471), 2023-03-25
Supplement: s1 [file s1]

**Table S2 Sequencing quality and mapping results.**

| Samples  | Raw reads  | Clean reads | Q20 (%) | Q30 (%) | GC (%) | Mapping rate (%) |
|----------|------------|-------------|---------|---------|--------|------------------|
| C_0h_1   | 44,822,088 | 44,401,358  | 97.42   | 93.02   | 39.89  | 87.71            |
| C_0h_2   | 46,604,268 | 46,067,346  | 97.39   | 92.97   | 38.64  | 87.25            |
| C_0h_3   | 42,199,716 | 41,745,596  | 97.08   | 92.31   | 39.10  | 86.13            |
| C_4h_1   | 42,594,570 | 42,050,900  | 97.56   | 93.35   | 39.79  | 88.28            |
| C_4h_2   | 45,122,216 | 44,583,624  | 97.37   | 92.89   | 40.01  | 87.80            |
| C_4h_3   | 43,910,186 | 43,339,204  | 97.44   | 93.00   | 39.72  | 87.67            |
| Cu_4h_1  | 43,979,834 | 43,386,214  | 97.41   | 92.95   | 40.01  | 87.99            |
| Cu_4h_2  | 43,743,466 | 43,329,698  | 97.47   | 93.04   | 39.84  | 88.14            |
| Cu_4h_3  | 45,143,934 | 44,644,632  | 97.41   | 92.94   | 39.86  | 88.24            |
| C_24h_1  | 45,374,672 | 44,918,056  | 97.51   | 93.17   | 39.82  | 88.32            |
| C_24h_2  | 40,894,638 | 40,402,580  | 97.59   | 93.30   | 38.92  | 88.10            |
| C_24h_3  | 42,664,646 | 42,060,564  | 97.65   | 93.45   | 38.74  | 87.88            |
| Cu_24h_1 | 43,299,278 | 42,842,716  | 97.46   | 93.06   | 39.73  | 87.31            |
| Cu_24h_2 | 44,860,386 | 44,400,024  | 96.56   | 93.22   | 39.91  | 88.31            |
| Cu_24h_3 | 45,026,224 | 44,490,218  | 97.23   | 92.94   | 39.95  | 87.63            |
