# Supplementary material for: Preliminary Exploration of Metabolic Mechanisms in Copper-Exposed Sepia esculenta Based on Transcriptome Analysis
Source: MDPI journal article supplement (doi:10.3390/metabo13040471), 2023-03-25
Supplement: s1 [file s1]

**Table S3 Summary of PPI network.**

| Network statistics             |          |
|--------------------------------|----------|
| Number of nodes                | 40       |
| Number of edges                | 103      |
| Average node degree            | 5.15     |
| Clustering coefficient         | 0.441    |
| Expected number of edges       | 48       |
| PPI enrichment <i>P</i> -value | 2.36E-12 |
